# Supplementary material for: Post-Marketing Benefit–Risk Assessment of Rotavirus Vaccination in Japan: A Simulation and Modelling Analysis
Source: PubMed Central journal article supplement — Drug Saf. 2016 Jan 9;39:219–30. doi: 10.1007/s40264-015-0376-7 (PMC4749653; doi:10.1007/s40264-015-0376-7), 2016-01-09

## **SUPPLEMENTARY MATERIALS**

**Journal:** Drug Safety

### **Post-marketing Benefit Risk Assessment of Rotavirus Vaccination in Japan: A Simulation and Modelling Analysis**

Edouard Ledent<sup>1\*</sup>, Alfons Lieftucht<sup>2</sup>, Hubert Buyse<sup>3</sup>, Keiji Sugiyama<sup>4</sup>, Michael Mckenna<sup>3#</sup> and  
Katsiaryna Holl<sup>5</sup>

<sup>1</sup>Clinical Statistics, GSK Vaccines, Rixensart, Belgium

<sup>2</sup>Chief Medical Office, GSK UK Ltd, Uxbridge, United Kingdom

<sup>3</sup>Safety Department, GSK Vaccines, Wavre, Belgium

<sup>4</sup>Japan Vaccine Co., Ltd., Tokyo, Japan

<sup>5</sup>Health Economics Department, GSK Vaccines, Wavre, Belgium

#Current Address: Otsuka Europe Development and Commercialisation Ltd, Wexham, United Kingdom.

\*Corresponding author: Edouard Ledent; Email: [edouard.y.ledent@gsk.com](mailto:edouard.y.ledent@gsk.com)

## Abstract

**背景** ロタリックス®は、GSK社の経口弱毒生ヒトロタウイルスワクチンであり2011年より日本にて発売されている。ワクチンによるロタウイルス胃腸炎（RVGE）の減少傾向も最近報告されている。しかしながら、observed/expected解析によりワクチンの初回接種後7日間での腸重積症（IS）と一過性の関連も示されている。

**目的** 本報告ではワクチン接種のベネフィットとリスクをそれぞれ比較し、ベネフィット-リスク解析を実施した。

**方法** 日本においてロタリックス®2回接種後のワクチンにて予防されうるRVGE関連の入院数と死亡数（ベネフィット）、またIS関連の入院数と死亡数（リスク）をシミュレーションを用いて比較した。使用したデータは、ピアレビュー誌に掲載された臨床試験論文および疫学研究論文、日本国政府統計データ（総務省統計局）、市場調査情報である。

**結果** ベネフィット-リスク解析により、日本の年間出生数である100万人の日本人乳幼児をワクチン接種後5年間追跡した場合、ワクチン接種によってRVGEに関連の入院と死亡が、それぞれ最大17,900件および最大6.3件予防可能であることが推計された。一方、ワクチン接種と関連性のあるIS入院数およびIS死亡数は、それぞれ最大50件および最大0.017件追加となると推計された。これらより、ワクチン接種により、ワクチンと関連性のあるIS入院1件あたり350件（95% CI: 69–2,510）のRVGE関連の入院と、ワクチンと関連性のあるIS死亡1件あたり366件（95% CI: 59–3271）のRVGE関連の死亡を予防することが可能であると推計された。

**結論** ロタリックス®におけるベネフィット-リスクのバランスは日本において良好であることが示唆された。公衆衛生の観点ではワクチン接種集団におけるベネフィット：RVGE関連の入院およびRVGE関連の死亡の予防は、推定されるISに起因するリスクを大きく上回ることが示唆された。

**Supplementary Table 1.** Estimated benefit and risk of vaccination with *Rotarix*<sup>TM</sup> in a cohort of 1 million Japanese children over a period of 5 years post-vaccination (main analysis)

| <b>Estimate</b>      | <b>Parameter</b> | <b>Mean</b> | <b>Median</b> | <b>2.5% and 97.5% pc.</b> |
|----------------------|------------------|-------------|---------------|---------------------------|
| Benefit <sup>a</sup> | RVGE-hospital.   | 17,833      | 17,925        | (11,715; 23,276)          |
|                      | RVGE-deaths      | 6.3         | 6.3           | (4.1; 8.2)                |
| Risk <sup>b</sup>    | IS-hospital.     | 69          | 50            | (7.2; 237)                |
|                      | IS-deaths        | 0.025       | 0.017         | (0.0020; 0.097)           |
| B-R ratio            | Hospital.        | 592         | 350           | (69; 2,510)               |
|                      | Deaths           | 705         | 366           | (59; 3,271)               |
| B-R difference       | Hospital.        | 17,764      | 17,855        | (11,643; 23,213)          |
|                      | Deaths           | 6.3         | 6.3           | (4.1; 8.2)                |

<sup>a</sup>Number of vaccine-prevented RVGE-related hospitalizations and deaths per 1 million vaccinated children followed from birth to 5 years of age; <sup>b</sup>Overall number of IS-related events caused during two risk windows of 7 days post-dose 1 and post-dose 2 of *Rotarix*<sup>TM</sup>. RVGE, rotavirus gastroenteritis; IS, intussusception; hospital., hospitalization; B-R, benefit-risk.

**Supplementary Table 2.** Sensitivity analysis of the estimated benefit and risk of vaccination with *Rotarix*<sup>TM</sup> in a cohort of 1 million Japanese children over a period of 5 years post-vaccination, considering a 21-day risk period instead of 7 days for the IS increased risk

| <b>Estimate</b> | <b>Parameter</b>          | <b>Mean</b> | <b>Median</b> | <b>2.5% and 97.5% pc.</b> |
|-----------------|---------------------------|-------------|---------------|---------------------------|
| Benefit         | RVGE-hospital.            | 17,833      | 17,925        | (11,715; 23,276)          |
|                 | RVGE-deaths               | 6.3         | 6.3           | (4.1; 8.2)                |
| Risk            | IS-hospital. <sup>a</sup> | 246         | 189           | (32; 772)                 |
|                 | IS-deaths <sup>a</sup>    | 0.090       | 0.064         | (0.008; 0.327)            |
| B-R ratio       | Hospital. <sup>a</sup>    | 142         | 93            | (21; 561)                 |
|                 | Deaths <sup>a</sup>       | 169         | 97            | (17; 748)                 |
| B-R difference  | Hospital. <sup>a</sup>    | 17,568      | 17,661        | (11,425; 23,430)          |
|                 | Deaths <sup>a</sup>       | 6.2         | 6.2           | (4.0; 8.2)                |

RVGE, rotavirus gastroenteritis; IS, intussusception; Hosp., hospitalization; prev., prevented; B-R, benefit-risk. <sup>a</sup>These results are different from the main analysis as a result of our sensitivity analysis considering a 21-day window for the increased-risk in intussusception instead of a 7-day window (main analysis).

**Supplementary Figure 1.** The distribution of vaccine efficacy post-dose 1

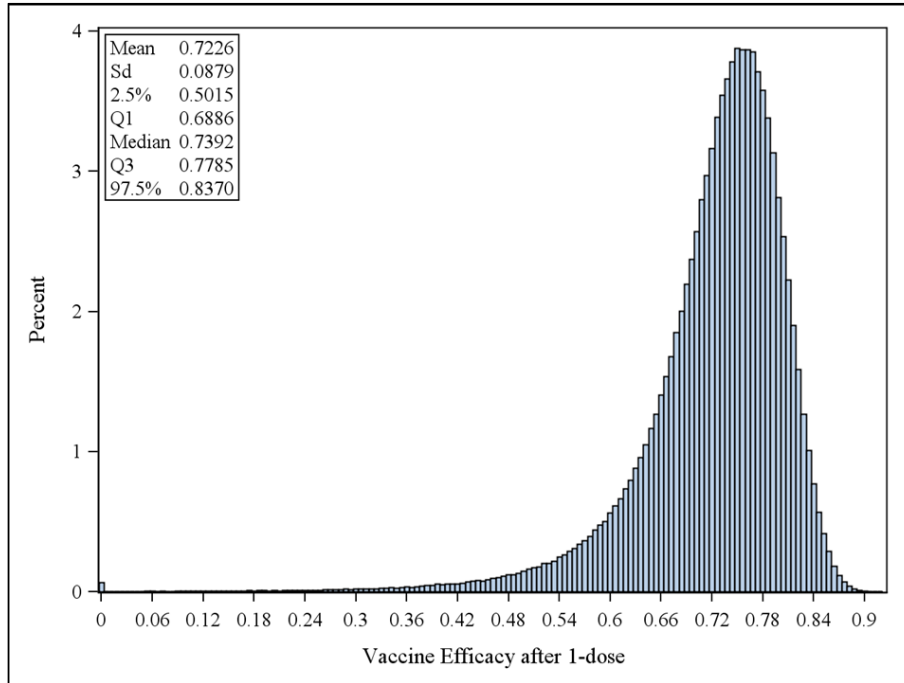

**Supplementary Figure 2.** Age distribution of children at first dose of *Rotarix*<sup>TM</sup>, as derived from unpublished market survey data

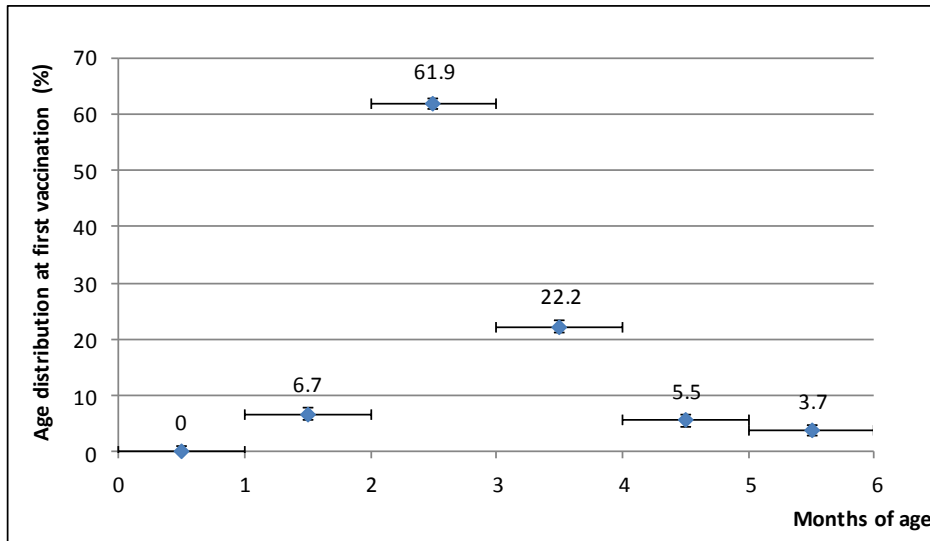

**Supplementary Figure 3.** Distribution of the delays before administration of the second dose, as derived from unpublished market survey data

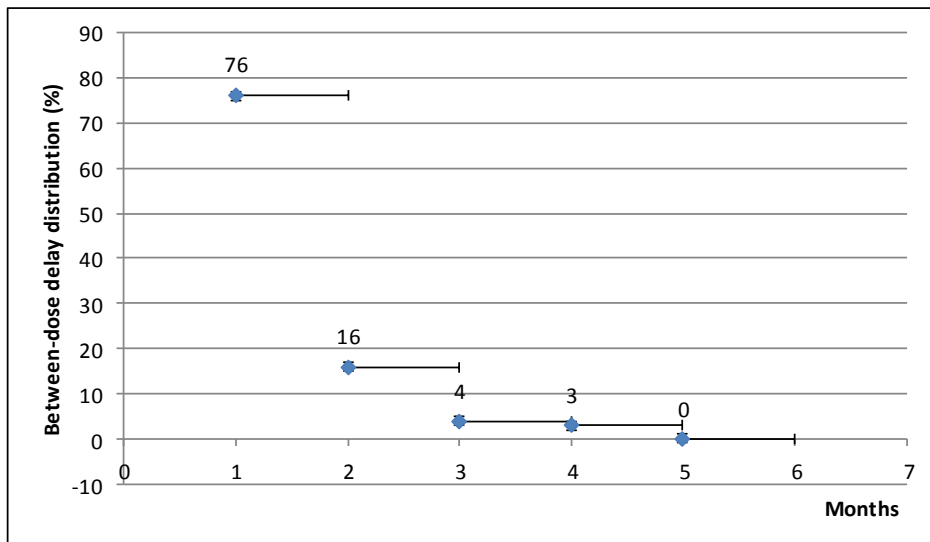

**Supplementary Figure 4.** Reduction in the number of RVGE-hospitalizations (**a**) and in the number of RVGE-deaths (**b**) in a cohort of 1 million vaccinated Japanese children followed for 5 years post-vaccination with 2 doses of *Rotarix*<sup>TM</sup>

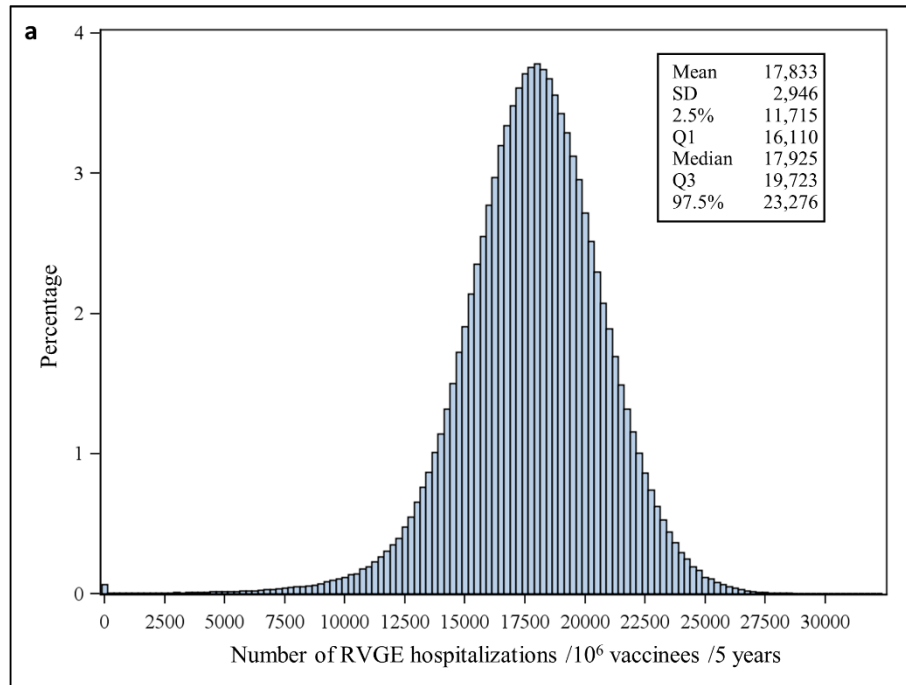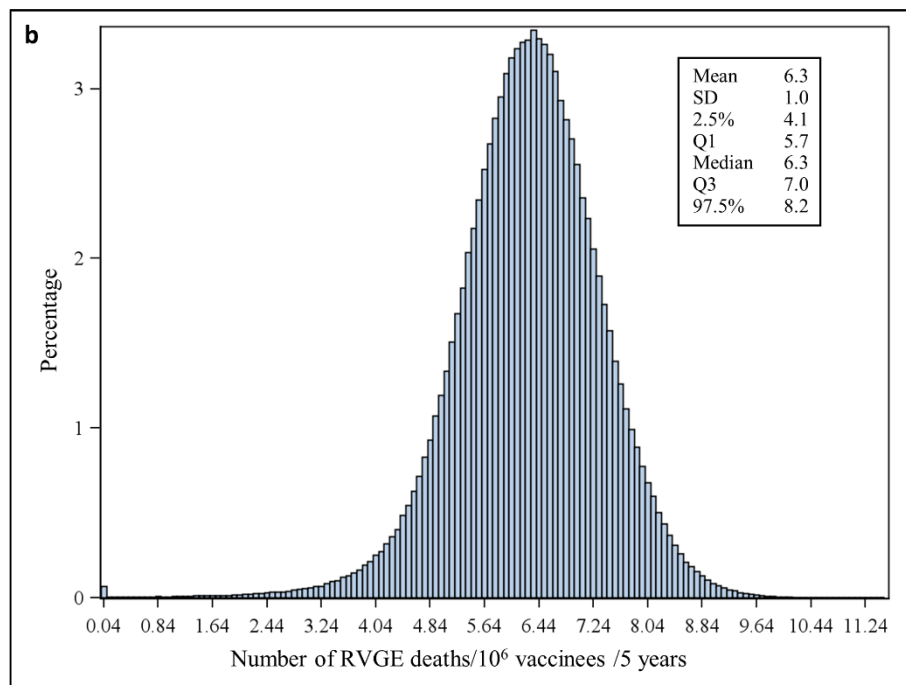

**Supplementary Figure 5.** Overall increase in numbers of IS-hospitalizations (a) and IS-deaths (b) in a cohort of 1 million vaccinated Japanese children

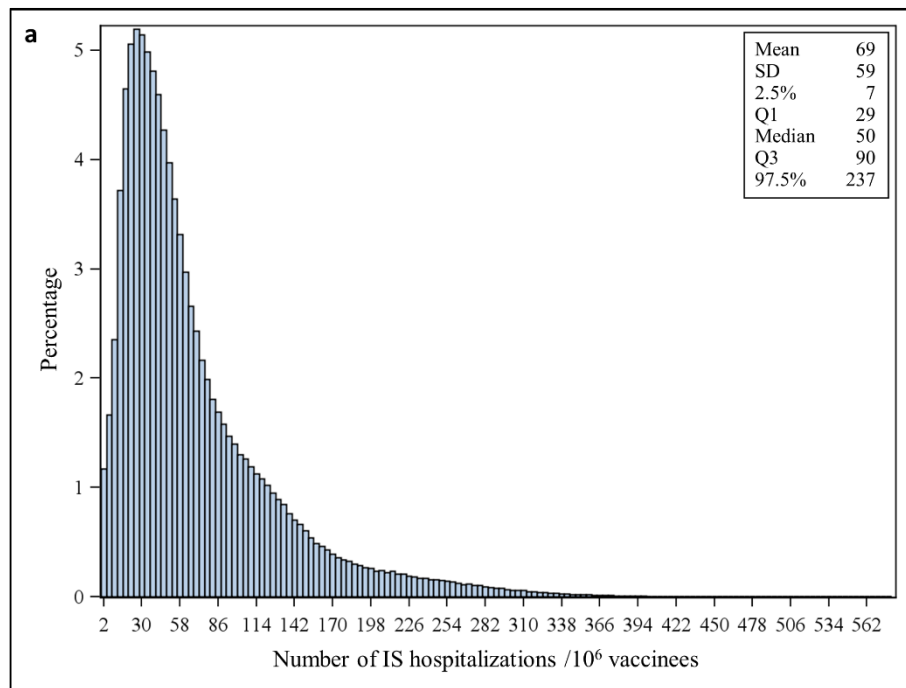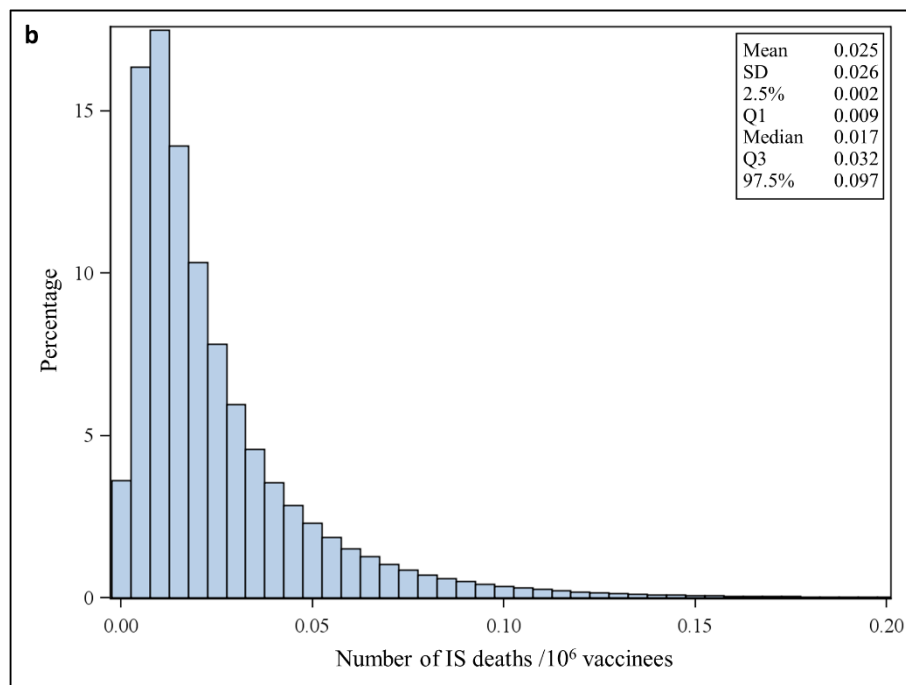



**Supplementary Figure 6.** Benefit-risk ratio expressed as number of hospitalizations

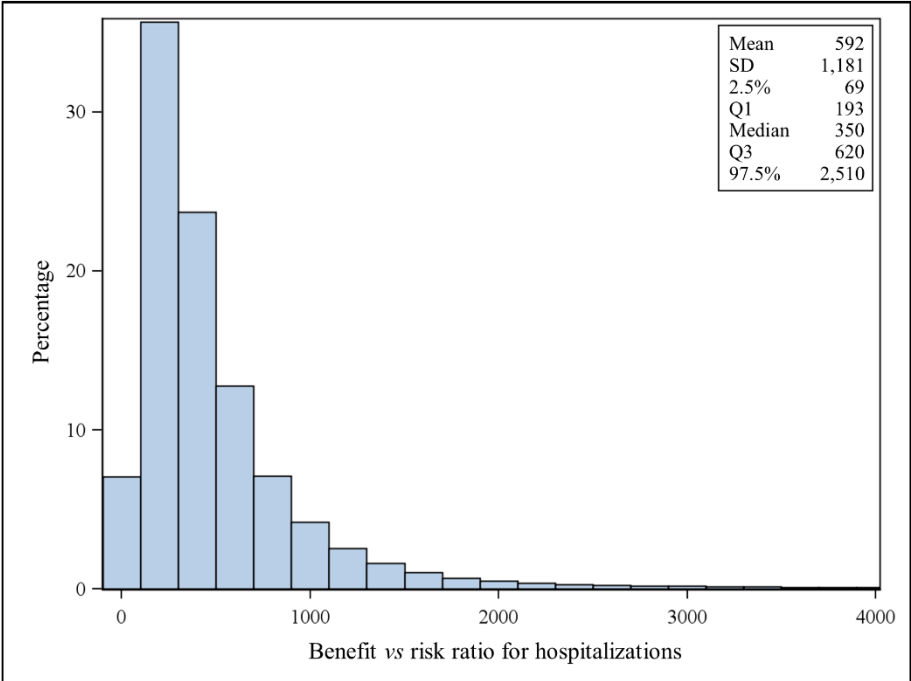

Supplement: 40264_2015_376_MOESM1_ESM.pdf [file 40264_2015_376_MOESM1_ESM.pdf]
